## Correction

# Correction: Running the Gauntlet: Regional Movement Patterns of *Manta alfredi* through a Complex of Parks and Fisheries

## The PLOS ONE Staff

There are errors in the Author Contributions. The correct contributions are: Conceived and designed the experiments: ESG ADM. Analyzed the data: ESG ADM. Contributed to the writing of the manuscript: ESG ADM.

Additionally, there is an error in Table 2. The second data entry under Gili Islands for Identification # INNLP0074A should begin with a left-facing arrow, not with an asterisk. Please view the correct Table 2 here.

**Table 2.** The sighting records of individual rays migrating between Nusa Penida and Gili Islands or West Manggarai & Komodo regions.

| Identification # | Nusa Penida  | Gili Islands | West Manggarai & Komodo | Time between Resightings (days) | Approximate Distance (km) |
|------------------|--------------|--------------|-------------------------|---------------------------------|---------------------------|
| INNLP0031A       | 2009-Aug-18⇒ |              | ⇒2013-Apr-03            | 1324                            | 450                       |
|                  | 2013-Sep-07⇐ |              | ⇐2013-Apr-03            | 157                             | 450                       |
| INNLP0057A       | 2012-Sep-22⇒ | ⇒2013-Jan-31 |                         | 131                             | 80                        |
| INNLP0059A       | 2008-Dec-25⇒ |              | ⇒2013-Mar-24            | 1550                            | 450                       |
|                  | 2013-Jun-03⇐ |              | ⇐2013-Mar-24            | 72                              | 450                       |
|                  | 2013-Dec-07⇒ |              | ⇒2014-Jan-09            | 33                              | 450                       |
| INNLP0074A       | 2012-Mar-06⇒ | ⇒2013-Feb-12 |                         | 343                             | 80                        |
|                  | 2013-Mar-22⇐ | ⇐2013-Feb-12 |                         | 38                              | 80                        |
| INNLP0229A       | 2012-Sep-13⇒ |              | ⇒2013-Jun-10            | 270                             | 435                       |
|                  | 2014-Jul-18⇐ |              | ⇐2014-Jun-04            | 44                              | 435                       |

Arrows highlight direction of movements. ⇒ west to east movements; ⇐ east to west movements.  
doi:10.1371/journal.pone.0110071.t002

## Reference

1. Germanov ES, Marshall AD (2014) Running the Gauntlet: Regional Movement Patterns of *Manta alfredi* through a Complex of Parks and Fisheries. PLoS ONE 9(10): e110071. doi:10.1371/journal.pone.0110071

**Citation:** The PLOS ONE Staff (2014) Correction: Running the Gauntlet: Regional Movement Patterns of *Manta alfredi* through a Complex of Parks and Fisheries. PLoS ONE 9(12): e115660. doi:10.1371/journal.pone.0115660

**Published:** December 10, 2014

**Copyright:** © 2014 The PLOS ONE Staff. This is an open-access article distributed under the terms of the Creative Commons Attribution License, which permits unrestricted use, distribution, and reproduction in any medium, provided the original author and source are credited.
